# Supplementary material
Source: HighWire-hosted journal article supplement (https://bjsm.bmj.com/content/51/22/1605)
Supplement: inline-supplementary-material-1 [file inline-supplementary-material-1.docx]

Appendix 1. Femoroacetabular impingement syndrome diagnosis criteria([1](#_ENREF_1)) reported in included studies

| **Study** | **Symptoms** | **Clinical Signs** | **Diagnostic Imaging** |
| --- | --- | --- | --- |
| Espinosa, N. (2006)([2](#_ENREF_2)) | X | X | X |
| Philippon, M. (2007)([3](#_ENREF_3)) | X | X | X |
| Philippon, M. (2008)([4](#_ENREF_4)) | X | X | X |
| Ilizaliturri, V. (2008)([5](#_ENREF_5)) | X | X | X |
| Philippon, M. (2009)([6](#_ENREF_6)) | X | X | X |
| Laude, F. (2009)([7](#_ENREF_7)) | X | X | X |
| Graves, M. (2009)([8](#_ENREF_8)) | X | X | X |
| Brunner, A. (2009)([9](#_ENREF_9)) | X | X | X |
| Hartmann, A. (2009)([10](#_ENREF_10)) | X | X | X |
| Lincoln, M. (2009)([11](#_ENREF_11)) | X | X | X |
| Yun, H. (2009)([12](#_ENREF_12)) | X | X | X |
| Philippon, M (2010)([13](#_ENREF_13)) | X | X | X |
| Peters, C. (2010)([14](#_ENREF_14)) | X | X | X |
| Clohisy, J. (2010)([15](#_ENREF_15)) | X | X | X |
| Gédouin, J. (2010)([16](#_ENREF_16)) | X | X | X |
| Byrd, J. (2011)([17](#_ENREF_17)) | X | X | X |
| Schilders, E. (2011)([18](#_ENREF_18)) | X | X | X |
| Kappe, T. (2011)([19](#_ENREF_19)) | X | X | X |
| Rylander, J. (2011)([20](#_ENREF_20)) | X | X | X |
| Bedi, A. (2011)([21](#_ENREF_21)) | X | X | X |
| Nho, S. (2011)([22](#_ENREF_22)) | X | X | X |
| Byrd, J. (2011)([23](#_ENREF_23)) | X | X | X |
| Jäger, M. (2011)([24](#_ENREF_24)) | X | X | X |
| Lamontagne, M. (2011)([25](#_ENREF_25)) | X | X | X |
| Flecher, X. (2011)([26](#_ENREF_26)) | X | X | X |
| Javed, A. (2011)([27](#_ENREF_27)) | X | X | X |
| Peters, C. (2011)([28](#_ENREF_28)) | X | X | X |
| Fabricant, R. (2012)([29](#_ENREF_29)) | X | X | X |
| Chiron, P. (2012)([30](#_ENREF_30)) | X | X | X |
| Walker, J. (2012)([31](#_ENREF_31)) | X | X | X |
| Parvizi, J. (2012)([32](#_ENREF_32)) | X | X | X |
| Cohen, S. (2012)([33](#_ENREF_33)) | X | X | X |
| Philippon, M. (2012)([34](#_ENREF_34)) | X | X | X |
| Naal, F. (2012)([35](#_ENREF_35)) | X | X | X |
| Palmer, D. (2012)([36](#_ENREF_36)) | X | X | X |
| Wassilew, G. (2013)([37](#_ENREF_37)) | X | X | X |
| Cooper, A. (2013)([38](#_ENREF_38)) | X | X | X |
| Zingg, P. (2013)([39](#_ENREF_39)) | X | X | X |
| Tran, P. (2013)([40](#_ENREF_40)) | X | X | X |
| Trompeter, A. (2013)([41](#_ENREF_41)) | X | X | X |
| Sink, E. (2013)([42](#_ENREF_42)) | X | X | X |
| Rylander, J. (2013)([43](#_ENREF_43)) | X | X | X |
| Malviya, A. (2013)([44](#_ENREF_44)) | X | X | X |
| Klingenstein, G. (2013)([45](#_ENREF_45)) | X | X | X |
| Srinivasan, S. (2013)([46](#_ENREF_46)) | X | X | X |
| Nossa, J. (2014)([47](#_ENREF_47)) | X | X | X |
| Ayeni, O. (2014)([48](#_ENREF_48)) | X | X | X |
| Mei-Dan, O. (2014)([49](#_ENREF_49)) | X | X | X |
| Ellermann, J. (2014)([50](#_ENREF_50)) | X | X | X |
| Skendzel, J. (2014)([51](#_ENREF_51)) | X | X | X |
| Jayasekera, N. (2014)([52](#_ENREF_52)) | X | X | X |
| Gupta, A. (2014)([53](#_ENREF_53)) | X | X | X |
| Mladenovic, D. (2014)([54](#_ENREF_54)) | X | X | X |
| Nepple, J. (2014)([55](#_ENREF_55)) | X | X | X |
| Nielsen, T. (2014)([56](#_ENREF_56)) | X | X | X |
| Nepple, J. (2015)([57](#_ENREF_57)) | X | X | X |
| Ricciardi, B. (2015)([58](#_ENREF_58)) | X | X | X |
| Redmond, J. (2015)([59](#_ENREF_59)) | X | X | X |
| Impellizzeri, F. (2015)([60](#_ENREF_60)) | X | X | X |
| Yanke, A. (2015)([61](#_ENREF_61)) | X | X | X |
| Hingsammer, A. (2015)([62](#_ENREF_62)) | X |  | X |
| Rafols, C. (2015)([63](#_ENREF_63)) | X |  | X |
| Larson, C. (2008)([64](#_ENREF_64)) | X |  | X |
| Larson, C. (2011)([65](#_ENREF_65)) | X |  | X |
| Redmond et al. (2015)([66](#_ENREF_66)) | X |  | X |
| Philippon, M. (2007)([67](#_ENREF_67)) |  | X | X |
| Brunner, A. (2009)([68](#_ENREF_68)) |  | X | X |
| Horisberger, M. (2010)([69](#_ENREF_69)) | X |  | X |
| Haviv, B. (2010)([70](#_ENREF_70)) | X | X |  |
| Horisberger, M. (2010)([71](#_ENREF_71)) |  | X | X |
| Gédouin, J. (2010)([72](#_ENREF_72)) | X |  | X |
| Naal, F. 2011)([73](#_ENREF_73)) |  | X | X |
| Naal, F. (2011)([74](#_ENREF_74)) |  | X | X |
| Philippon, M. (2012)([75](#_ENREF_75)) |  | X | X |
| Rupp, R. (2012)([76](#_ENREF_76)) | X | X |  |
| Malviya, A. (2012)([77](#_ENREF_77)) | X |  | X |
| Krych, A. (2013)([78](#_ENREF_78)) |  | X | X |
| Aprato, A. (2013)([79](#_ENREF_79)) |  | X | X |
| Steppacher, S. (2013)([80](#_ENREF_80)) |  | X | X |
| Domb, B. (2013)([81](#_ENREF_81)) |  | X | X |
| Dippmann, C. (2014)([82](#_ENREF_82)) |  | X | X |
| Potter, M. (2014)([83](#_ENREF_83)) | X | X |  |
| Park, M. (2014)([84](#_ENREF_84)) | X |  | X |
| Frank, R. (2014)([85](#_ENREF_85)) | X |  | X |
| Khan, O. (2014)([86](#_ENREF_86)) | X |  | X |
| Gicquel, T. (2014)([87](#_ENREF_87)) | X |  | X |
| Peters, C. (2014)([88](#_ENREF_88)) | X | X |  |
| Steppacher, S. (2014)([89](#_ENREF_89)) |  | X | X |
| Naal, F. (2014)([90](#_ENREF_90)) |  | X | X |
| Kaya, M. (2014)([91](#_ENREF_91)) |  | X | X |
| Ross, J. (2015)([92](#_ENREF_92)) | X |  | X |
| Ferro, F. (2015)([93](#_ENREF_93)) |  | X | X |
| Chahal, J. (2015)([94](#_ENREF_94)) |  | X | X |
| Fabricant, P. (2015)([95](#_ENREF_95)) |  | X | X |
| Hingshammer, A. (2015)([96](#_ENREF_96)) |  | X | X |
| Ross et al. (2015)([97](#_ENREF_97)) | X |  | X |
| Bulat, E. (2016)([98](#_ENREF_98)) | X |  | X |
| Byrd, J. (2009)([99](#_ENREF_99)) | X |  |  |
| Polat, G. (2013)([100](#_ENREF_100)) |  |  | X |
| Murphy, S. (2004)([101](#_ENREF_101)) |  | X |  |
| Botser, I. (2014)([102](#_ENREF_102)) |  |  | X |
| Bardakos, N. (2008)([103](#_ENREF_103)) |  |  | X |
| Kempthorne, J. (2011)([104](#_ENREF_104)) |  | X |  |
| Büchler, L. (2013)([105](#_ENREF_105)) |  |  | X |
| Matsuda, D. (2014)([106](#_ENREF_106)) | X |  |  |
| Malagelada, F. (2015)([107](#_ENREF_107)) |  |  | X |
| Roos, B. (2015)([108](#_ENREF_108)) |  |  | X |

Appendix 2. Detail of Clinical Signs reported in included studies

| **Study** | **Clinical Signs** | |
| --- | --- | --- |
|  | **Range-of-motion (ROM)** | **Special Tests** |
| 25% of studies reporting both ROM and special tests clinical signs | | |
| Fabricant, R. (2012)([29](#_ENREF_29)) | X | X |
| Parvizi, J. (2012)([32](#_ENREF_32)) | X | X |
| Klingenstein, G. (2013)([45](#_ENREF_45)) | X | X |
| Yun, H. (2009)([12](#_ENREF_12)) | X | X |
| Javed, A. (2011)([27](#_ENREF_27)) | X | X |
| Naal, F. (2012)([35](#_ENREF_35)) | X | X |
| Sink, E. (2013)([42](#_ENREF_42)) | X | X |
| Mei-Dan, O. (2014)([49](#_ENREF_49)) | X | X |
| Gupta, A. (2014)([53](#_ENREF_53)) | X | X |
| Impellizzeri, F. (2015)([60](#_ENREF_60)) | X | X |
| Yanke, A. (2015)([61](#_ENREF_61)) | X | X |
| Philippon, M. (2007)([67](#_ENREF_67)) | X | X |
| Philippon, M. (2009)([6](#_ENREF_6)) | X | X |
| Horisberger, M. (2010)([71](#_ENREF_71)) | X | X |
| Clohisy, J. (2010)([15](#_ENREF_15)) | X | X |
| Naal, F. 2011)([73](#_ENREF_73)) | X | X |
| Naal, F. (2011)([74](#_ENREF_74)) | X | X |
| Jäger, M. (2011)([24](#_ENREF_24)) | X | X |
| Chiron, P. (2012)([30](#_ENREF_30)) | X | X |
| Wassilew, G. (2013)([37](#_ENREF_37)) | X | X |
| Zingg, P. (2013)([39](#_ENREF_39)) | X | X |
| Steppacher, S. (2013)([80](#_ENREF_80)) | X | X |
| Naal, F. (2014)([90](#_ENREF_90)) | X | X |
| Dippmann, C. (2014)([82](#_ENREF_82)) | X | X |
| Steppacher, S. (2014)([89](#_ENREF_89)) | X | X |
| Nielsen, T. (2014)([56](#_ENREF_56)) | X | X |
| Fabricant, P. (2015)([95](#_ENREF_95)) | X | X |
| 49% of studies reporting either ROM or special tests clinical signs | | |
| Skendzel, J. (2014)([51](#_ENREF_51)) |  | X |
| Srinivasan, S. (2013)([46](#_ENREF_46)) |  | X |
| Potter, M. (2014)([83](#_ENREF_83)) |  | X |
| Ricciardi, B. (2015)([58](#_ENREF_58)) | X |  |
| Philippon, M. (2007)([3](#_ENREF_3)) |  | X |
| Espinosa, N. (2006)([2](#_ENREF_2)) |  | X |
| Philippon, M. (2008)([4](#_ENREF_4)) |  | X |
| Graves, M. (2009)([8](#_ENREF_8)) |  | X |
| Hartmann, A. (2009)([10](#_ENREF_10)) |  | X |
| Philippon, M (2010)([13](#_ENREF_13)) |  | X |
| Peters, C. (2010)([14](#_ENREF_14)) |  | X |
| Flecher, X. (2011)([26](#_ENREF_26)) |  | X |
| Nho, S. (2011)([22](#_ENREF_22)) |  | X |
| Rylander, J. (2011)([20](#_ENREF_20)) |  | X |
| Cohen, S. (2012)([33](#_ENREF_33)) |  | X |
| Philippon, M. (2012)([34](#_ENREF_34)) |  | X |
| Cooper, A. (2013)([38](#_ENREF_38)) |  | X |
| Palmer, D. (2012)([36](#_ENREF_36)) |  | X |
| Tran, P. (2013)([40](#_ENREF_40)) |  | X |
| Rylander, J. (2013)([43](#_ENREF_43)) |  | X |
| Malviya, A. (2013)([44](#_ENREF_44)) |  | X |
| Trompeter, A. (2013)([41](#_ENREF_41)) | X |  |
| Ellermann, J. (2014)([50](#_ENREF_50)) |  | X |
| Ayeni, O. (2014)([48](#_ENREF_48)) |  | X |
| Jayasekera, N. (2014)([52](#_ENREF_52)) |  | X |
| Mladenovic, D. (2014)([54](#_ENREF_54)) |  | X |
| Nepple, J. (2014)([55](#_ENREF_55)) | X |  |
| Redmond, J. (2015)([59](#_ENREF_59)) |  | X |
| Chahal, J. (2015)([94](#_ENREF_94)) |  | X |
| Murphy, S. (2004)([101](#_ENREF_101)) |  | X |
| Ilizaliturri, V. (2008)([5](#_ENREF_5)) | X |  |
| Laude, F. (2009)([7](#_ENREF_7)) |  | X |
| Lincoln, M. (2009)([11](#_ENREF_11)) |  | X |
| Brunner, A. (2009)([68](#_ENREF_68)) |  | X |
| Brunner, A. (2009)([9](#_ENREF_9)) |  | X |
| Gédouin, J. (2010)([16](#_ENREF_16)) |  | X |
| Kempthorne, J. (2011)([104](#_ENREF_104)) |  | X |
| Peters, C. (2011)([28](#_ENREF_28)) |  | X |
| Lamontagne, M. (2011)([25](#_ENREF_25)) |  | X |
| Schilders, E. (2011)([18](#_ENREF_18)) |  | X |
| Kappe, T. (2011)([19](#_ENREF_19)) |  | X |
| Philippon, M. (2012)([75](#_ENREF_75)) |  | X |
| Rupp, R. (2012)([76](#_ENREF_76)) |  | X |
| Walker, J. (2012)([31](#_ENREF_31)) |  | X |
| Krych, A. (2013)([78](#_ENREF_78)) |  | X |
| Aprato, A. (2013)([79](#_ENREF_79)) |  | X |
| Domb, B. (2013)([81](#_ENREF_81)) |  | X |
| Nossa, J. (2014)([47](#_ENREF_47)) |  | X |
| Kaya, M. (2014)([91](#_ENREF_91)) |  | X |
| Peters, C. (2014)([88](#_ENREF_88)) |  | X |
| Hingshammer, A. (2015)([96](#_ENREF_96)) |  | X |
| Nepple, J. (2015)([57](#_ENREF_57)) |  | X |
| Ferro, F. (2015)([93](#_ENREF_93)) |  | X |
| 26% of studies reporting neither ROM or special tests clinical signs | | |
| Byrd, J. (2011)([23](#_ENREF_23)) |  |  |
| Bedi, A. (2011)([21](#_ENREF_21)) |  |  |
| Byrd, J. (2011)([17](#_ENREF_17)) |  |  |
| Byrd, J. (2009)([99](#_ENREF_99)) |  |  |
| Haviv, B. (2010)([70](#_ENREF_70)) |  |  |
| Polat, G. (2013)([100](#_ENREF_100)) |  |  |
| Botser, I. (2014)([102](#_ENREF_102)) |  |  |
| Hingsammer, A. (2015)([62](#_ENREF_62)) |  |  |
| Redmond et al. (2015)([66](#_ENREF_66)) |  |  |
| Rafols, C. (2015)([63](#_ENREF_63)) |  |  |
| Larson, C. (2011)([65](#_ENREF_65)) |  |  |
| Larson, C. (2008)([64](#_ENREF_64)) |  |  |
| Bardakos, N. (2008)([103](#_ENREF_103)) |  |  |
| Horisberger, M. (2010)([69](#_ENREF_69)) |  |  |
| Gédouin, J. (2010)([72](#_ENREF_72)) |  |  |
| Malviya, A. (2012)([77](#_ENREF_77)) |  |  |
| Büchler, L. (2013)([105](#_ENREF_105)) |  |  |
| Park, M. (2014)([84](#_ENREF_84)) |  |  |
| Matsuda, D. (2014)([106](#_ENREF_106)) |  |  |
| Frank, R. (2014)([85](#_ENREF_85)) |  |  |
| Khan, O. (2014)([86](#_ENREF_86)) |  |  |
| Gicquel, T. (2014)([87](#_ENREF_87)) |  |  |
| Ross, J. (2015)([92](#_ENREF_92)) |  |  |
| Malagelada, F. (2015)([107](#_ENREF_107)) |  |  |
| Ross et al. (2015)([97](#_ENREF_97)) |  |  |
| Roos, B. (2015)([108](#_ENREF_108)) |  |  |
| Bulat, E. (2016)([98](#_ENREF_98)) |  |  |
| Sansone, M. (2015)([109](#_ENREF_109)) |  |  |

Appendix 3. Detail of Diagnostic Imaging reported in included studies

| **Study** | **Diagnostic Imaging** | | | |
| --- | --- | --- | --- | --- |
| **FAI and/or labral tear pathology on MRI/MRA** | **Alpha angle on radiographs** | **CEA on radiographs** | **Crossover sign on radiographs** |
| 24% of studies reporting all four imaging criteria | | | | |
| Philippon, M. (2009)([6](#_ENREF_6)) | X | X | X | X |
| Yun, H. (2009)([12](#_ENREF_12)) | X | X | X | X |
| Horisberger, M. (2010)([71](#_ENREF_71)) | X | X | X | X |
| Philippon, M (2010)([13](#_ENREF_13)) | X | X | X | X |
| Naal, F. 2011)([73](#_ENREF_73)) | X | X | X | X |
| Philippon, M. (2012)([34](#_ENREF_34)) | X | X | X | X |
| Naal, F. (2012)([35](#_ENREF_35)) | X | X | X | X |
| Tran, P. (2013)([40](#_ENREF_40)) | X | X | X | X |
| Krych, A. (2013)([78](#_ENREF_78)) | X | X | X | X |
| Zingg, P. (2013)([39](#_ENREF_39)) | X | X | X | X |
| Aprato, A. (2013)([79](#_ENREF_79)) | X | X | X | X |
| Klingenstein, G. (2013)([45](#_ENREF_45)) | X | X | X | X |
| Rylander, J. (2013)([43](#_ENREF_43)) | X | X | X | X |
| Domb, B. (2013)([81](#_ENREF_81)) | X | X | X | X |
| Naal, F. (2014)([90](#_ENREF_90)) | X | X | X | X |
| Ayeni, O. (2014)([48](#_ENREF_48)) | X | X | X | X |
| Ellermann, J. (2014)([50](#_ENREF_50)) | X | X | X | X |
| Park, M. (2014)([84](#_ENREF_84)) | X | X | X | X |
| Gicquel, T. (2014)([87](#_ENREF_87)) | X | X | X | X |
| Gupta, A. (2014)([53](#_ENREF_53)) | X | X | X | X |
| Redmond et al. (2015)([66](#_ENREF_66)) | X | X | X | X |
| Ricciardi, B. (2015)([58](#_ENREF_58)) | X | X | X | X |
| Nepple, J. (2014)([55](#_ENREF_55)) | X | X | X | X |
| Ferro, F. (2015)([93](#_ENREF_93)) | X | X | X | X |
| Malagelada, F. (2015)([107](#_ENREF_107)) | X | X | X | X |
| Bulat, E. (2016)([98](#_ENREF_98)) | X | X | X | X |
| 25% of studies reporting three out of four imaging criteria | | | | |
| Philippon, M. (2008)([4](#_ENREF_4)) | X | X |  | X |
| Nho, S. (2011)([22](#_ENREF_22)) |  | X | X | X |
| Fabricant, R. (2012)([29](#_ENREF_29)) | X | X |  | X |
| Schilders, E. (2011)([18](#_ENREF_18)) |  | X | X | X |
| Kappe, T. (2011)([19](#_ENREF_19)) |  | X | X | X |
| Philippon, M. (2012)([75](#_ENREF_75)) |  | X | X | X |
| Chiron, P. (2012)([30](#_ENREF_30)) | X | X |  | X |
| Palmer, D. (2012)([36](#_ENREF_36)) | X | X |  | X |
| Wassilew, G. (2013)([37](#_ENREF_37)) |  | X | X | X |
| Srinivasan, S. (2013)([46](#_ENREF_46)) | X | X | X |  |
| Steppacher, S. (2013)([80](#_ENREF_80)) |  | X | X | X |
| Polat, G. (2013)([100](#_ENREF_100)) | X | X | X |  |
| Nossa, J. (2014)([47](#_ENREF_47)) |  | X | X | X |
| Skendzel, J. (2014)([51](#_ENREF_51)) |  | X | X | X |
| Jayasekera, N. (2014)([52](#_ENREF_52)) | X | X | X |  |
| Mladenovic, D. (2014)([54](#_ENREF_54)) |  | X | X | X |
| Steppacher, S. (2014)([89](#_ENREF_89)) |  | X | X | X |
| Nielsen, T. (2014)([56](#_ENREF_56)) |  | X | X | X |
| Botser, I. (2014)([102](#_ENREF_102)) | X | X |  | X |
| Rafols, C. (2015)([63](#_ENREF_63)) | X | X |  | X |
| Ross, J. (2015)([92](#_ENREF_92)) |  | X | X | X |
| Chahal, J. (2015)([94](#_ENREF_94)) | X | X | X |  |
| Fabricant, P. (2015)([95](#_ENREF_95)) |  | X | X | X |
| Roos, B. (2015)([108](#_ENREF_108)) | X | X | X |  |
| Ross et al. (2015)([97](#_ENREF_97)) |  | X | X | X |
| Hingshammer, A. (2015)([96](#_ENREF_96)) | X | X | X |  |
| Hingsammer, A. (2015)([62](#_ENREF_62)) |  | X | X | X |
| 21% of studies reporting two out of four imaging criteria | | | | |
| Dippmann, C. (2014)([82](#_ENREF_82)) |  | X |  | X |
| Sink, E. (2013)([42](#_ENREF_42)) |  | X | X |  |
| Ilizaliturri, V. (2008)([5](#_ENREF_5)) |  |  | X | X |
| Philippon, M. (2007)([67](#_ENREF_67)) |  |  | X | X |
| Philippon, M. (2007)([3](#_ENREF_3)) |  |  | X | X |
| Larson, C. (2008)([64](#_ENREF_64)) | X | X |  |  |
| Graves, M. (2009)([8](#_ENREF_8)) |  |  | X | X |
| Lincoln, M. (2009)([11](#_ENREF_11)) | X | X |  |  |
| Brunner, A. (2009)([68](#_ENREF_68)) | X | X |  |  |
| Brunner, A. (2009)([9](#_ENREF_9)) | X | X |  |  |
| Hartmann, A. (2009)([10](#_ENREF_10)) | X |  |  | X |
| Horisberger, M. (2010)([69](#_ENREF_69)) | X | X |  |  |
| Gédouin, J. (2010)([72](#_ENREF_72)) |  | X |  | X |
| Clohisy, J. (2010)([15](#_ENREF_15)) | X | X |  |  |
| Peters, C. (2011)([28](#_ENREF_28)) |  |  | X | X |
| Jäger, M. (2011)([24](#_ENREF_24)) | X | X |  |  |
| Rylander, J. (2011)([20](#_ENREF_20)) |  |  | X | X |
| Parvizi, J. (2012)([32](#_ENREF_32)) | X | X |  |  |
|  |  |  |  |  |
| Frank, R. (2014)([85](#_ENREF_85)) |  | X | X |  |
| Kaya, M. (2014)([91](#_ENREF_91)) |  | X |  | X |
| Nepple, J. (2015)([57](#_ENREF_57)) |  | X |  | X |
| Yanke, A. (2015)([61](#_ENREF_61)) | X | X |  |  |
| 22% of studies reporting one out of four imaging criteria | | | | |
| Trompeter, A. (2013)([41](#_ENREF_41)) |  |  |  | X |
| Espinosa, N. (2006)([2](#_ENREF_2)) | X |  |  |  |
| Bardakos, N. (2008)([103](#_ENREF_103)) |  |  |  | X |
| Laude, F. (2009)([7](#_ENREF_7)) | X |  |  |  |
| Peters, C. (2010)([14](#_ENREF_14)) | X |  |  |  |
| Gédouin, J. (2010)([16](#_ENREF_16)) | X |  |  |  |
| Naal, F. (2011)([74](#_ENREF_74)) | X |  |  |  |
| Larson, C. (2011)([65](#_ENREF_65)) |  | X |  |  |
| Lamontagne, M. (2011)([25](#_ENREF_25)) |  | X |  |  |
| Flecher, X. (2011)([26](#_ENREF_26)) | X |  |  |  |
| Javed, A. (2011)([27](#_ENREF_27)) | X |  |  |  |
| Byrd, J. (2011)([23](#_ENREF_23)) |  |  |  | X |
| Bedi, A. (2011)([21](#_ENREF_21)) |  | X |  |  |
| Byrd, J. (2011)([17](#_ENREF_17)) |  |  |  | X |
| Cohen, S. (2012)([33](#_ENREF_33)) | X |  |  |  |
| Malviya, A. (2012)([77](#_ENREF_77)) | X |  |  |  |
| Walker, J. (2012)([31](#_ENREF_31)) | X |  |  |  |
| Cooper, A. (2013)([38](#_ENREF_38)) | X |  |  |  |
| Büchler, L. (2013)([105](#_ENREF_105)) |  | X |  |  |
| Malviya, A. (2013)([44](#_ENREF_44)) | X |  |  |  |
| Mei-Dan, O. (2014)([49](#_ENREF_49)) | X |  |  |  |
| Khan, O. (2014)([86](#_ENREF_86)) |  | X |  |  |
| Redmond, J. (2015)([59](#_ENREF_59)) | X |  |  |  |
| Impellizzeri, F. (2015)([60](#_ENREF_60)) | X |  |  |  |
| 8% of studies not reporting any of four imaging criteria | | | | |
| Murphy, S. (2004)([101](#_ENREF_101)) |  |  |  |  |
| Byrd, J. (2009)([99](#_ENREF_99)) |  |  |  |  |
| Haviv, B. (2010)([70](#_ENREF_70)) |  |  |  |  |
| Kempthorne, J. (2011)([104](#_ENREF_104)) |  |  |  |  |
| Rupp, R. (2012)([76](#_ENREF_76)) |  |  |  |  |
| Potter, M. (2014)([83](#_ENREF_83)) |  |  |  |  |
| Matsuda, D. (2014)([106](#_ENREF_106)) |  |  |  |  |
| Peters, C. (2014)([88](#_ENREF_88)) |  |  |  |  |
| Sansone, M. (2015)([109](#_ENREF_109)) |  |  |  |  |

MRI, magnetic resonance imaging; MRA, magnetic resonance arthrogram; CEA, center edge angle

Appendix 4. Studies reporting use of any form of non-surgical treatment as a surgical criterion for FAIS surgery.

| **Study** | **Non-Surgical Treatment** |
| --- | --- |
| Fabricant, R. (2012)([29](#_ENREF_29)) | X |
| Parvizi, J. (2012)([32](#_ENREF_32)) | X |
| Klingenstein, G. (2013)([45](#_ENREF_45)) | X |
| Yun, H. (2009)([12](#_ENREF_12)) | X |
| Javed, A. (2011)([27](#_ENREF_27)) | X |
| Naal, F. (2012)([35](#_ENREF_35)) | X |
| Srinivasan, S. (2013)([46](#_ENREF_46)) | X |
| Sink, E. (2013)([42](#_ENREF_42)) | X |
| Mei-Dan, O. (2014)([49](#_ENREF_49)) | X |
| Potter, M. (2014)([83](#_ENREF_83)) | X |
| Gupta, A. (2014)([53](#_ENREF_53)) | X |
| Ricciardi, B. (2015)([58](#_ENREF_58)) | X |
| Impellizzeri, F. (2015)([60](#_ENREF_60)) | X |
| Yanke, A. (2015)([61](#_ENREF_61)) | X |
| Philippon, M. (2007)([3](#_ENREF_3)) | X |
| Espinosa, N. (2006)([2](#_ENREF_2)) | X |
| Graves, M. (2009)([8](#_ENREF_8)) | X |
| Hartmann, A. (2009)([10](#_ENREF_10)) | X |
| Philippon, M (2010)([13](#_ENREF_13)) | X |
| Larson, C. (2011)([65](#_ENREF_65)) | X |
| Flecher, X. (2011)([26](#_ENREF_26)) | X |
| Nho, S. (2011)([22](#_ENREF_22)) | X |
| Cohen, S. (2012)([33](#_ENREF_33)) | X |
| Philippon, M. (2012)([34](#_ENREF_34)) | X |
| Cooper, A. (2013)([38](#_ENREF_38)) | X |
| Palmer, D. (2012)([36](#_ENREF_36)) | X |
| Tran, P. (2013)([40](#_ENREF_40)) | X |
| Malviya, A. (2013)([44](#_ENREF_44)) | X |
| Trompeter, A. (2013)([41](#_ENREF_41)) | X |
| Ellermann, J. (2014)([50](#_ENREF_50)) | X |
| Jayasekera, N. (2014)([52](#_ENREF_52)) | X |
| Mladenovic, D. (2014)([54](#_ENREF_54)) | X |
| Nepple, J. (2014)([55](#_ENREF_55)) | X |
| Redmond, J. (2015)([59](#_ENREF_59)) | X |
| Chahal, J. (2015)([94](#_ENREF_94)) | X |
| Byrd, J. (2009)([99](#_ENREF_99)) | X |
| Haviv, B. (2010)([70](#_ENREF_70)) | X |
| Byrd, J. (2011)([23](#_ENREF_23)) | X |
| Bedi, A. (2011)([21](#_ENREF_21)) | X |
| Byrd, J. (2011)([17](#_ENREF_17)) | X |
| Polat, G. (2013)([100](#_ENREF_100)) | X |
| Botser, I. (2014)([102](#_ENREF_102)) | X |
| Hingsammer, A. (2015)([62](#_ENREF_62)) | X |
| Redmond et al. (2015)([66](#_ENREF_66)) | X |
| Rafols, C. (2015)([63](#_ENREF_63)) | X |
| Sansone, M. (2015)([109](#_ENREF_109)) | X |
| Ferro, F. (2015)([93](#_ENREF_93)) |  |
| Bardakos, N. (2008)([103](#_ENREF_103)) |  |
| Horisberger, M. (2010)([69](#_ENREF_69)) |  |
| Gédouin, J. (2010)([72](#_ENREF_72)) |  |
| Malviya, A. (2012)([77](#_ENREF_77)) |  |
| Büchler, L. (2013)([105](#_ENREF_105)) |  |
| Park, M. (2014)([84](#_ENREF_84)) |  |
| Matsuda, D. (2014)([106](#_ENREF_106)) |  |
| Frank, R. (2014)([85](#_ENREF_85)) |  |
| Khan, O. (2014)([86](#_ENREF_86)) |  |
| Gicquel, T. (2014)([87](#_ENREF_87)) |  |
| Ross, J. (2015)([92](#_ENREF_92)) |  |
| Malagelada, F. (2015)([107](#_ENREF_107)) |  |
| Ross et al. (2015)([97](#_ENREF_97)) |  |
| Roos, B. (2015)([108](#_ENREF_108)) |  |
| Bulat, E. (2016)([98](#_ENREF_98)) |  |
| Philippon, M. (2007)([67](#_ENREF_67)) |  |
| Philippon, M. (2008)([4](#_ENREF_4)) |  |
| Philippon, M. (2009)([6](#_ENREF_6)) |  |
| Horisberger, M. (2010)([71](#_ENREF_71)) |  |
| Wassilew, G. (2013)([37](#_ENREF_37)) |  |
| Zingg, P. (2013)([39](#_ENREF_39)) |  |
| Rylander, J. (2013)([43](#_ENREF_43)) |  |
| Steppacher, S. (2013)([80](#_ENREF_80)) |  |
| Naal, F. (2014)([90](#_ENREF_90)) |  |
| Hingshammer, A. (2015)([96](#_ENREF_96)) |  |
| Nepple, J. (2015)([57](#_ENREF_57)) |  |
| Nossa, J. (2014)([47](#_ENREF_47)) |  |
| Kaya, M. (2014)([91](#_ENREF_91)) |  |
| Peters, C. (2014)([88](#_ENREF_88)) |  |
| Rupp, R. (2012)([76](#_ENREF_76)) |  |
| Walker, J. (2012)([31](#_ENREF_31)) |  |
| Krych, A. (2013)([78](#_ENREF_78)) |  |
| Aprato, A. (2013)([79](#_ENREF_79)) |  |
| Domb, B. (2013)([81](#_ENREF_81)) |  |
| Schilders, E. (2011)([18](#_ENREF_18)) |  |
| Kappe, T. (2011)([19](#_ENREF_19)) |  |
| Philippon, M. (2012)([75](#_ENREF_75)) |  |
| Kempthorne, J. (2011)([104](#_ENREF_104)) |  |
| Peters, C. (2011)([28](#_ENREF_28)) |  |
| Lamontagne, M. (2011)([25](#_ENREF_25)) |  |
| Lincoln, M. (2009)([11](#_ENREF_11)) |  |
| Brunner, A. (2009)([68](#_ENREF_68)) |  |
| Brunner, A. (2009)([9](#_ENREF_9)) |  |
| Gédouin, J. (2010)([16](#_ENREF_16)) |  |
| Fabricant, P. (2015)([95](#_ENREF_95)) |  |
| Murphy, S. (2004)([101](#_ENREF_101)) |  |
| Larson, C. (2008)([64](#_ENREF_64)) |  |
| Ilizaliturri, V. (2008)([5](#_ENREF_5)) |  |
| Laude, F. (2009)([7](#_ENREF_7)) |  |
| Steppacher, S. (2014)([89](#_ENREF_89)) |  |
| Nielsen, T. (2014)([56](#_ENREF_56)) |  |
| Dippmann, C. (2014)([82](#_ENREF_82)) |  |
| Ayeni, O. (2014)([48](#_ENREF_48)) |  |
| Jäger, M. (2011)([24](#_ENREF_24)) |  |
| Rylander, J. (2011)([20](#_ENREF_20)) |  |
| Chiron, P. (2012)([30](#_ENREF_30)) |  |
| Peters, C. (2010)([14](#_ENREF_14)) |  |
| Clohisy, J. (2010)([15](#_ENREF_15)) |  |
| Naal, F. 2011)([73](#_ENREF_73)) |  |
| Naal, F. (2011)([74](#_ENREF_74)) |  |

REFERENCES

1. Griffin DR, Dickenson EJ, Agricola R, et al. The 2016 Warwick Agreement on Femoroacetabular Impingement Syndrome (FAI syndrome): An international consensus statement. *Br J Sports Med* 2016;50.

2. Espinosa N, Rothenfluh DA, Beck M, et al. Treatment of femoro-acetabular impingement: preliminary results of labral refixation. *J Bone Joint Surg Am* 2006;88(5):925-35.

3. Philippon M, Schenker M, Briggs K, et al. Femoroacetabular impingement in 45 professional athletes: associated pathologies and return to sport following arthroscopic decompression. *Knee Surg Sports Traumatol Arthrosc* 2007;15(7):908-14.

4. Philippon MJ, Yen YM, Briggs KK, et al. Early outcomes after hip arthroscopy for femoroacetabular impingement in the athletic adolescent patient: a preliminary report. *J Pediatr Orthop* 2008;28(7):705-10.

5. Ilizaliturri VM, Jr., Orozco-Rodriguez L, Acosta-Rodriguez E, et al. Arthroscopic treatment of cam-type femoroacetabular impingement: preliminary report at 2 years minimum follow-up. *J Arthroplasty* 2008;23(2):226-34.

6. Philippon MJ, Briggs KK, Yen YM, et al. Outcomes following hip arthroscopy for femoroacetabular impingement with associated chondrolabral dysfunction: minimum two-year follow-up. *J Bone Joint Surg Br* 2009;91(1):16-23.

7. Laude F, Sariali E, Nogier A. Femoroacetabular impingement treatment using arthroscopy and anterior approach. *Clin Orthop Relat Res* 2009;467(3):747-52.

8. Graves ML, Mast JW. Femoroacetabular impingement: do outcomes reliably improve with surgical dislocations? *Clin Orthop Relat Res* 2009;467(3):717-23.

9. Brunner A, Horisberger M, Herzog RF. Sports and recreation activity of patients with femoroacetabular impingement before and after arthroscopic osteoplasty. *Am J Sports Med* 2009;37(5):917-22.

10. Hartmann A, Gunther KP. Arthroscopically assisted anterior decompression for femoroacetabular impingement: technique and early clinical results. *Arch Orthop Trauma Surg* 2009;129(8):1001-9.

11. Lincoln M, Johnston K, Muldoon M, et al. Combined arthroscopic and modified open approach for cam femoroacetabular impingement: a preliminary experience. *Arthroscopy* 2009;25(4):392-9.

12. Yun HH, Shon WY, Yun JY. Treatment of femoroacetabular impingement with surgical dislocation. *Clin Orthop Surg* 2009;1(3):146-54.

13. Philippon MJ, Weiss DR, Kuppersmith DA, et al. Arthroscopic labral repair and treatment of femoroacetabular impingement in professional hockey players. *Am J Sports Med* 2010;38(1):99-104.

14. Peters CL, Schabel K, Anderson L, et al. Open treatment of femoroacetabular impingement is associated with clinical improvement and low complication rate at short-term followup. *Clin Orthop Relat Res* 2010;468(2):504-10.

15. Clohisy JC, Zebala LP, Nepple JJ, et al. Combined hip arthroscopy and limited open osteochondroplasty for anterior femoroacetabular impingement. *J Bone Joint Surg Am* 2010;92(8):1697-706.

16. Gedouin JE, Duperron D, Langlais F, et al. Update to femoroacetabular impingement arthroscopic management. *Orthop Traumatol Surg Res* 2010;96(3):222-7.

17. Byrd JW, Jones KS. Arthroscopic management of femoroacetabular impingement: minimum 2-year follow-up. *Arthroscopy* 2011;27(10):1379-88.

18. Schilders E, Dimitrakopoulou A, Bismil Q, et al. Arthroscopic treatment of labral tears in femoroacetabular impingement: a comparative study of refixation and resection with a minimum two-year follow-up. *J Bone Joint Surg Br* 2011;93(8):1027-32.

19. Kappe T, Kocak T, Bieger R, et al. Radiographic risk factors for labral lesions in femoroacetabular impingement. *Clin Orthop Relat Res* 2011;469(11):3241-7.

20. Rylander JH, Shu B, Andriacchi TP, et al. Preoperative and postoperative sagittal plane hip kinematics in patients with femoroacetabular impingement during level walking. *Am J Sports Med* 2011;39 Suppl:36S-42S.

21. Bedi A, Zaltz I, De La Torre K, et al. Radiographic comparison of surgical hip dislocation and hip arthroscopy for treatment of cam deformity in femoroacetabular impingement. *Am J Sports Med* 2011;39 Suppl:20S-8S.

22. Nho SJ, Magennis EM, Singh CK, et al. Outcomes after the arthroscopic treatment of femoroacetabular impingement in a mixed group of high-level athletes. *Am J Sports Med* 2011;39 Suppl:14S-9S.

23. Byrd JW, Jones KS. Arthroscopic management of femoroacetabular impingement in athletes. *Am J Sports Med* 2011;39 Suppl:7S-13S.

24. Jager M, Bittersohl B, Zilkens C, et al. Surgical hip dislocation in symptomatic cam femoroacetabular impingement: what matters in early good results? *Eur J Med Res* 2011;16(5):217-22.

25. Lamontagne M, Brisson N, Kennedy MJ, et al. Preoperative and postoperative lower-extremity joint and pelvic kinematics during maximal squatting of patients with cam femoro-acetabular impingement. *J Bone Joint Surg Am* 2011;93 Suppl 2:40-5.

26. Flecher X, Dumas J, Argenson JN. Is a hip distractor useful in the arthroscopic treatment of femoroacetabular impingement? *Orthop Traumatol Surg Res* 2011;97(4):381-8.

27. Javed A, O'Donnell JM. Arthroscopic femoral osteochondroplasty for cam femoroacetabular impingement in patients over 60 years of age. *J Bone Joint Surg Br* 2011;93(3):326-31.

28. Peters CL, Anderson LA, Erickson JA, et al. An algorithmic approach to surgical decision making in acetabular retroversion. *Orthopedics* 2011;34(1):10.

29. Fabricant PD, Heyworth BE, Kelly BT. Hip arthroscopy improves symptoms associated with FAI in selected adolescent athletes. *Clin Orthop Relat Res* 2012;470(1):261-9.

30. Chiron P, Espie A, Reina N, et al. Surgery for femoroacetabular impingement using a minimally invasive anterolateral approach: analysis of 118 cases at 2.2-year follow-up. *Orthop Traumatol Surg Res* 2012;98(1):30-8.

31. Walker JA, Pagnotto M, Trousdale RT, et al. Preliminary pain and function after labral reconstruction during femoroacetabular impingement surgery. *Clin Orthop Relat Res* 2012;470(12):3414-20.

32. Parvizi J, Huang R, Diaz-Ledezma C, et al. Mini-open femoroacetabular osteoplasty: how do these patients do? *J Arthroplasty* 2012;27(8 Suppl):122-5 e1.

33. Cohen SB, Huang R, Ciccotti MG, et al. Treatment of femoroacetabular impingement in athletes using a mini-direct anterior approach. *Am J Sports Med* 2012;40(7):1620-7.

34. Philippon MJ, Ejnisman L, Ellis HB, et al. Outcomes 2 to 5 years following hip arthroscopy for femoroacetabular impingement in the patient aged 11 to 16 years. *Arthroscopy* 2012;28(9):1255-61.

35. Naal FD, Miozzari HH, Schar M, et al. Midterm results of surgical hip dislocation for the treatment of femoroacetabular impingement. *Am J Sports Med* 2012;40(7):1501-10.

36. Palmer DH, Ganesh V, Comfort T, et al. Midterm outcomes in patients with cam femoroacetabular impingement treated arthroscopically. *Arthroscopy* 2012;28(11):1671-81.

37. Wassilew GI, Janz V, Heller MO, et al. Real time visualization of femoroacetabular impingement and subluxation using 320-slice computed tomography. *J Orthop Res* 2013;31(2):275-81.

38. Cooper AP, Basheer SZ, Maheshwari R, et al. Outcomes of hip arthroscopy. A prospective analysis and comparison between patients under 25 and over 25 years of age. *Br J Sports Med* 2013;47(4):234-8.

39. Zingg PO, Ulbrich EJ, Buehler TC, et al. Surgical hip dislocation versus hip arthroscopy for femoroacetabular impingement: clinical and morphological short-term results. *Arch Orthop Trauma Surg* 2013;133(1):69-79.

40. Tran P, Pritchard M, O'Donnell J. Outcome of arthroscopic treatment for cam type femoroacetabular impingement in adolescents. *ANZ J Surg* 2013;83(5):382-6.

41. Trompeter A, Colegate-Stone T, Khakha R, et al. Hip arthroscopy for femoroacetabular impingement: results of 118 consecutive cases in a district general hospital. *Hip int* 2013;23(4):400-5.

42. Sink EL, Fabricant PD, Pan Z, et al. Results of treatment of femoroacetabular impingement in adolescents with a surgical hip dislocation approach. *Clin Orthop Relat Res* 2013;471(8):2563-9.

43. Rylander J, Shu B, Favre J, et al. Functional testing provides unique insights into the pathomechanics of femoroacetabular impingement and an objective basis for evaluating treatment outcome. *J Orthop Res* 2013;31(9):1461-8.

44. Malviya A, Paliobeis CP, Villar RN. Do professional athletes perform better than recreational athletes after arthroscopy for femoroacetabular impingement? *Clin Orthop Relat Res* 2013;471(8):2477-83.

45. Klingenstein GG, Zbeda RM, Bedi A, et al. Prevalence and preoperative demographic and radiographic predictors of bilateral femoroacetabular impingement. *Am J Sports Med* 2013;41(4):762-8.

46. Srinivasan SC, Hosny HA, Williams MR. Combined hip arthroscopy and limited open osteochondroplasty for anterior femoroacetabular impingement: early patient reported outcomes. *Hip int* 2013;23(2):218-24.

47. Nossa JM, Aguilera B, Marquez W. Factors associated with hip arthroscopy complications in the treatment of femoroacetabular impingement. *Current Orthopaedic Practice* 2014;25(4):362-6.

48. Ayeni OR, Farrokhyar F, Crouch S, et al. Pre-operative intra-articular hip injection as a predictor of short-term outcome following arthroscopic management of femoroacetabular impingement. *Knee Surg Sports Traumatol Arthrosc* 2014.

49. Mei-Dan O, McConkey MO, Knudsen JS, et al. Bilateral hip arthroscopy under the same anesthetic for patients with symptomatic bilateral femoroacetabular impingement: 1-year outcomes. *Arthroscopy* 2014;30(1):47-54.

50. Ellermann J, Ziegler C, Nissi MJ, et al. Acetabular cartilage assessment in patients with femoroacetabular impingement by using T2* mapping with arthroscopic verification. *Radiology* 2014;271(2):512-23.

51. Skendzel JG, Philippon MJ, Briggs KK, et al. The effect of joint space on midterm outcomes after arthroscopic hip surgery for femoroacetabular impingement. *Am J Sports Med* 2014;42(5):1127-33.

52. Jayasekera N, Aprato A, Villar RN. Fat pad entrapment at the hip: a new diagnosis. *PLoS ONE* 2014;9(2):e83503.

53. Gupta A, Redmond JM, Stake CE, et al. Does the femoral cam lesion regrow after osteoplasty for femoroacetabular impingement? Two-year follow-up. *Am J Sports Med* 2014;42(9):2149-55.

54. Mladenovic D, Andjelkovic Z, Vukasinovic Z, et al. Early clinical results of surgical treatment of patients with femoroacetabular impingement. *Srp Arh Celok Lek* 2014;142(5-6):325-9.

55. Nepple JJ, Riggs CN, Ross JR, et al. Clinical presentation and disease characteristics of femoroacetabular impingement are sex-dependent. *J Bone Joint Surg Am* 2014;96(20):1683-9.

56. Nielsen TG, Miller LL, Lund B, et al. Outcome of arthroscopic treatment for symptomatic femoroacetabular impingement. *BMC Musculoskelet Disord* 2014;15:394.

57. Nepple JJ, Goljan P, Briggs KK, et al. Hip Strength Deficits in Patients With Symptomatic Femoroacetabular Impingement and Labral Tears. *Arthroscopy* 2015;31(11):2106-11.

58. Ricciardi BF, Fabricant PD, Fields KG, et al. What are the demographic and radiographic characteristics of patients with symptomatic extraarticular femoroacetabular impingement? *Clin Orthop Relat Res* 2015;473(4):1299-308.

59. Redmond JM, Gupta A, Stake CE, et al. Clinical results of hip arthroscopy for labral tears: a comparison between intraoperative platelet-rich plasma and bupivacaine injection. *Arthroscopy* 2015;31(3):445-53.

60. Impellizzeri FM, Mannion AF, Naal FD, et al. Validation of the Core Outcome Measures Index in Patients With Femoroacetabular Impingement. *Arthroscopy* 2015;31(7):1238-46.

61. Yanke AB, Khair MM, Stanley R, et al. Sex Differences in Patients With CAM Deformities With Femoroacetabular Impingement: 3-Dimensional Computed Tomographic Quantification. *Arthroscopy* 2015;31(12):2301-6.

62. Hingsammer AM, Lee CB, LaReau J, et al. Is acetabular osteoplasty always required in mixed impingement? *Eur J Orthop Surg Traumatol* 2015;25(2):331-8.

63. Rafols C, Monckeberg JE, Numair J, et al. Platelet-Rich Plasma Augmentation of Arthroscopic Hip Surgery for Femoroacetabular Impingement: A Prospective Study With 24-Month Follow-up. *Arthroscopy* 2015;31(10):1886-92.

64. Larson CM, Giveans MR. Arthroscopic management of femoroacetabular impingement: early outcomes measures. *Arthroscopy* 2008;24(5):540-6.

65. Larson CM, Giveans MR, Taylor M. Does arthroscopic FAI correction improve function with radiographic arthritis? *Clin Orthop Relat Res* 2011;469(6):1667-76.

66. Redmond JM, El Bitar YF, Gupta A, et al. Arthroscopic acetabuloplasty and labral refixation without labral detachment. *Am J Sports Med* 2015;43(1):105-12.

67. Philippon MJ, Maxwell RB, Johnston TL, et al. Clinical presentation of femoroacetabular impingement. *Knee Surg Sports Traumatol Arthrosc* 2007;15(8):1041-7.

68. Brunner A, Horisberger M, Herzog RF. Evaluation of a computed tomography-based navigation system prototype for hip arthroscopy in the treatment of femoroacetabular cam impingement. *Arthroscopy* 2009;25(4):382-91.

69. Horisberger M, Brunner A, Herzog RF. Arthroscopic treatment of femoroacetabular impingement of the hip: a new technique to access the joint. *Clin Orthop Relat Res* 2010;468(1):182-90.

70. Haviv B, Singh PJ, Takla A, et al. Arthroscopic femoral osteochondroplasty for cam lesions with isolated acetabular chondral damage. *J Bone Joint Surg Br* 2010;92(5):629-33.

71. Horisberger M, Brunner A, Herzog RF. Arthroscopic treatment of femoral acetabular impingement in patients with preoperative generalized degenerative changes. *Arthroscopy* 2010;26(5):623-9.

72. Gedouin JE, May O, Bonin N, et al. Assessment of arthroscopic management of femoroacetabular impingement. A prospective multicenter study. *Orthop Traumatol Surg Res* 2010;96(8 Suppl):S59-67.

73. Naal FD, Miozzari HH, Wyss TF, et al. Surgical hip dislocation for the treatment of femoroacetabular impingement in high-level athletes. *Am J Sports Med* 2011;39(3):544-50.

74. Naal FD, Impellizzeri FM, Miozzari HH, et al. The German Hip Outcome Score: validation in patients undergoing surgical treatment for femoroacetabular impingement. *Arthroscopy* 2011;27(3):339-45.

75. Philippon MJ, Schroder ESBG, Briggs KK. Hip arthroscopy for femoroacetabular impingement in patients aged 50 years or older. *Arthroscopy* 2012;28(1):59-65.

76. Rupp R, Duggan B. Peripheral versus central compartment starting point in hip arthroscopy for femoroacetabular impingement. *Orthopedics* 2012;35(2):e148-53.

77. Malviya A, Stafford GH, Villar RN. Is hip arthroscopy for femoroacetabular impingement only for athletes? *Br J Sports Med* 2012;46(14):1016-8.

78. Krych AJ, Thompson M, Knutson Z, et al. Arthroscopic labral repair versus selective labral debridement in female patients with femoroacetabular impingement: a prospective randomized study. *Arthroscopy* 2013;29(1):46-53.

79. Aprato A, Masse A, Faletti C, et al. Magnetic resonance arthrography for femoroacetabular impingement surgery: is it reliable? *J Orthop Traumatol* 2013;14(3):201-6.

80. Steppacher SD, Huemmer C, Schwab JM, et al. Surgical hip dislocation for treatment of femoroacetabular impingement: factors predicting 5-year survivorship. *Clin Orthop Relat Res* 2014;472(1):337-48.

81. Domb BG, Stake CE, Botser IB, et al. Surgical dislocation of the hip versus arthroscopic treatment of femoroacetabular impingement: a prospective matched-pair study with average 2-year follow-up. *Arthroscopy* 2013;29(9):1506-13.

82. Dippmann C, Thorborg K, Kraemer O, et al. Hip arthroscopy with labral repair for femoroacetabular impingement: short-term outcomes. *Knee Surg Sports Traumatol Arthrosc* 2014.

83. Potter MQ, Wylie JD, Sun GS, et al. Psychologic distress reduces preoperative self-assessment scores in femoroacetabular impingement patients. *Clin Orthop Relat Res* 2014;472(6):1886-92.

84. Park MS, Yoon SJ, Kim YJ, et al. Hip arthroscopy for femoroacetabular impingement: the changing nature and severity of associated complications over time. *Arthroscopy* 2014;30(8):957-63.

85. Frank RM, Lee S, Bush-Joseph CA, et al. Improved outcomes after hip arthroscopic surgery in patients undergoing T-capsulotomy with complete repair versus partial repair for femoroacetabular impingement: a comparative matched-pair analysis. *Am J Sports Med* 2014;42(11):2634-42.

86. Khan O, Witt J. Evaluation of the magnitude and location of Cam deformity using three dimensional CT analysis. *Bone Joint J* 2014;96-b(9):1167-71.

87. Gicquel T, Gedouin JE, Krantz N, et al. Function and osteoarthritis progression after arthroscopic treatment of femoro-acetabular impingement: A prospective study after a mean follow-up of 4.6 (4.2-5.5) years. *Orthopaedics and Traumatology: Surgery and Research* 2014;100(6):651-6.

88. Peters CL, Anderson LA, Diaz-Ledezma C, et al. Does the nature of chondrolabral injury affect the results of open surgery for femoroacetabular impingement? *Clin Orthop Relat Res* 2015;473(4):1342-8.

89. Steppacher SD, Anwander H, Zurmuhle CA, et al. Eighty Percent of Patients With Surgical Hip Dislocation for Femoroacetabular Impingement Have a Good Clinical Result Without Osteoarthritis Progression at 10 Years. *Clin Orthop Relat Res* 2014.

90. Naal FD, Schar M, Miozzari HH, et al. Sports and Activity Levels After Open Surgical Treatment of Femoroacetabular Impingement. *Am J Sports Med* 2014;42(7):1690-5.

91. Kaya M, Suziki T, Minowa T, et al. Ligamentum teres injury is associated with the articular damage pattern in patients with femoroacetabular impingement. *Arthroscopy* 2014;30(12):1582-7.

92. Ross JR, Tannenbaum EP, Nepple JJ, et al. Functional acetabular orientation varies between supine and standing radiographs: implications for treatment of femoroacetabular impingement. *Clin Orthop Relat Res* 2015;473(4):1267-73.

93. Ferro FP, Ho CP, Briggs KK, et al. Patient-centered outcomes after hip arthroscopy for femoroacetabular impingement and labral tears are not different in patients with normal, high, or low femoral version. *Arthroscopy* 2015;31(3):454-9.

94. Chahal J, Van Thiel GS, Mather RC, 3rd, et al. The Patient Acceptable Symptomatic State for the Modified Harris Hip Score and Hip Outcome Score Among Patients Undergoing Surgical Treatment for Femoroacetabular Impingement. *Am J Sports Med* 2015;43(8):1844-9.

95. Fabricant PD, Fields KG, Taylor SA, et al. The effect of femoral and acetabular version on clinical outcomes after arthroscopic femoroacetabular impingement surgery. *J Bone Joint Surg Am* 2015;97(7):537-43.

96. Hingsammer AM, Stelzeneder D, Kalish LA, et al. Prognostic factors for mid-term symptom relief after open surgical correction for femoroacetabular impingement. *Hip int* 2015;25(5):406-12.

97. Ross JR, Bedi A, Stone RM, et al. Characterization of symptomatic hip impingement in butterfly ice hockey goalies. *Arthroscopy* 2015;31(4):635-42.

98. Bulat E, Bixby SD, Siversson C, et al. Planar dGEMRIC Maps May Aid Imaging Assessment of Cartilage Damage in Femoroacetabular Impingement. *Clin Orthop Relat Res* 2016;474(2):467-78.

99. Byrd JW, Jones KS. Arthroscopic femoroplasty in the management of cam-type femoroacetabular impingement. *Clin Orthop Relat Res* 2009;467(3):739-46.

100. Polat G, Dikmen G, Erdil M, et al. Arthroscopic treatment of femoroacetabular impingement: early outcomes. *Acta Orthop Traumatol Turc* 2013;47(5):311-7.

101. Murphy S, Tannast M, Kim YJ, et al. Debridement of the adult hip for femoroacetabular impingement: indications and preliminary clinical results. *Clin Orthop Relat Res* 2004(429):178-81.

102. Botser IB, Jackson TJ, Smith TW, et al. Open surgical dislocation versus arthroscopic treatment of femoroacetabular impingement. *Am J Orthop (Belle Mead NJ)* 2014;43(5):209-14.

103. Bardakos NV, Vasconcelos JC, Villar RN. Early outcome of hip arthroscopy for femoroacetabular impingement: the role of femoral osteoplasty in symptomatic improvement. *J Bone Joint Surg Br* 2008;90(12):1570-5.

104. Kempthorne JT, Armour PC, Rietveld JA, et al. Surgical dislocation of the hip and the management of femoroacetabular impingement: results of the Christchurch experience. *ANZ J Surg* 2011;81(6):446-50.

105. Buchler L, Neumann M, Schwab JM, et al. Arthroscopic Versus Open Cam Resection in the Treatment of Femoroacetabular Impingement. *Arthroscopy - Journal of Arthroscopic and Related Surgery* 2013;29(4):653-60.

106. Matsuda DK, Schnieder CP, Sehgal B. The critical corner of cam femoroacetabular impingement: clinical support of an emerging concept. *Arthroscopy* 2014;30(5):575-80.

107. Malagelada F, Del Carmen VA, Barke SJ, et al. The anterior mini-open approach for femeroacetabular impingement: Gait and functional assessment at one year post-surgery. *Ann Phys Rehabil Med* 2015;58(2):60-5.

108. Roos BD, Roos MV, Junior AC, et al. Extracapsular approach for arthroscopic treatment of femoroacetabular impingement: clinical and radiographic results and complications. *Rev Bras Ortop* 2015;50(4):430-7.

109. Sansone M, Ahlden M, Jonasson P, et al. Good Results After Hip Arthroscopy for Femoroacetabular Impingement in Top-Level Athletes. *Orthop J Sports Med* 2015;3(2):2325967115569691.
